# Supplementary material for: An anthraquinone–enzyme–peptide hybrid as a photo-switchable enzyme
Source: Royal Society of Chemistry journal article supplement (doi:10.1039/c8cc06130k), 2018-01-01
Supplement: c8cc06130k1.pdf [file c8cc06130k1.pdf]

## Supporting Information

---

# An Anthraquinone—Enzyme—Peptide Hybrid as a Photo-Switchable Enzyme

Shota Sotokawa, Takashi Kitamura, Daisuke Takahashi, and

Kazunobu Toshima\*

*Department of Applied Chemistry, Faculty of Science and Technology, Keio University,  
3-14-1 Hiyoshi, Kohoku-ku, Yokohama 223-8522, Japan*

| Page | Contents                                                         |
|------|------------------------------------------------------------------|
| S-2  | • • • General methods for chemical synthesis                     |
| S-2  | • • • Materials                                                  |
| S-2  | • • • Synthesis of AQ—HRP—CPP hybrid <b>1</b>                    |
| S-3  | • • • MALDI TOF MS analysis                                      |
| S-4  | • • • UV spectrum charts of hybrid <b>1</b> and HRP ( <b>3</b> ) |
| S-5  | • • • Bradford assay                                             |
| S-5  | • • • Photo-self-degradation of hybrid <b>1</b>                  |
| S-5  | • • • Enzyme activity assay                                      |
| S-5  | • • • Cell culture                                               |
| S-6  | • • • Histological staining                                      |
| S-6  | • • • Western blotting                                           |
| S-7  | • • • MTT assay                                                  |
| S-7  | • • • References                                                 |

## General methods for chemical synthesis

Matrix-assisted laser desorption ionization time-of-flight mass spectrometry (MALDI TOF MS) was conducted using a Bruker Ultraflex mass spectrometer with detection in linear mode. Sinapinic acid was used as the matrix, with positive ionization mode. UV/vis spectra were recorded on a JASCO V-550 spectrometer.

## Materials

Sulfo-SMCC (**7**) was purchased from Dojindo. Horseradish peroxidase (HRP) (**3**) was purchased from Roche. R<sub>6</sub>GC peptide (**4**)<sup>[1]</sup> was purchased from Scrum. An antibody to  $\alpha$ -tubulin (DM1A) was purchased from Santa Cruz Biotechnology, Inc. (Santa Cruz, CA). An antibody to HRP (HP-03) was purchased from Abcam. HRP-conjugated anti-mouse IgG (NA931A) was purchased from GE Healthcare. The human epidermoid squamous carcinoma cell line, A431 (RCB0202), and the human normal diploid fibroblast cell line, WI-38 (RCB0704) were provided by the RIKEN BRC through the National Bio-Resource Project of the MEXT, Japan.

## Synthesis of AQ—HRP—CPP hybrid **1**

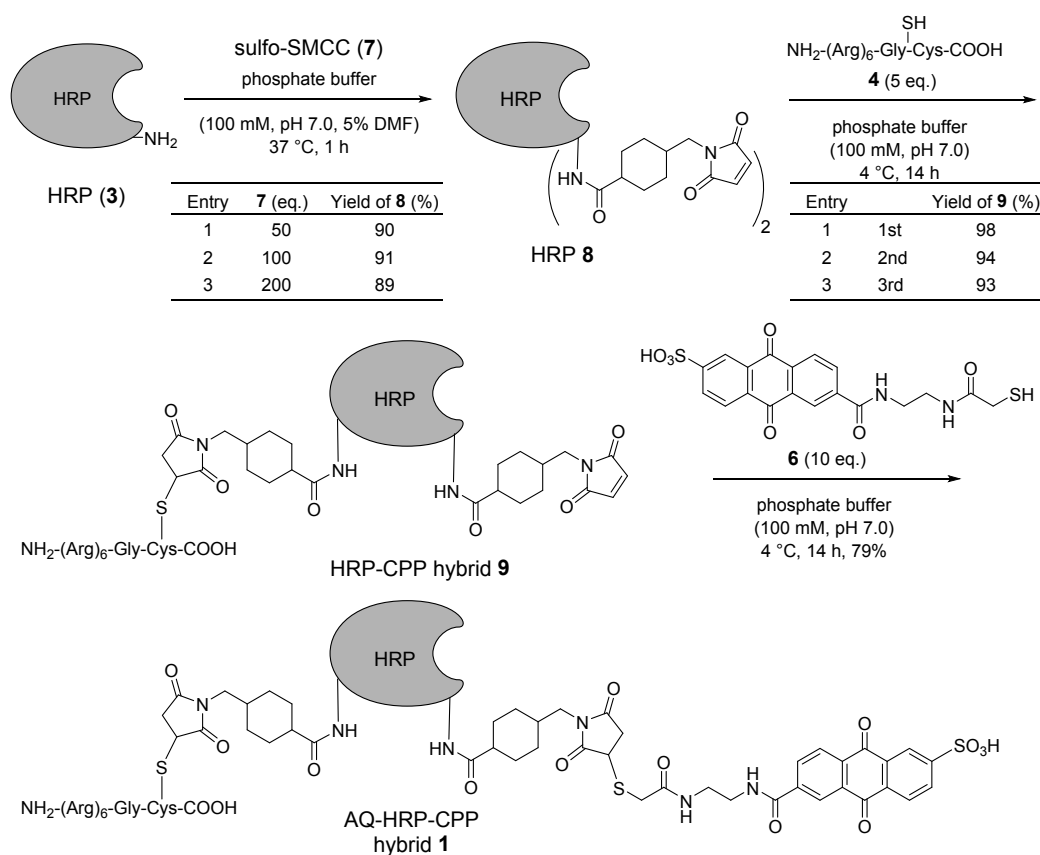

Scheme S1 Synthetic scheme of AQ—HRP—CPP hybrid **1**.

To a solution of HRP (**3**) (2.00 mg, 50.0 nmol) in 100 mM phosphate buffer (pH 7.0, 791  $\mu\text{L}$ ) was added sulfo-SMCC (**7**) (1.09 mg, 2500 nmol) in DMF (41.7  $\mu\text{L}$ ) at room temperature. After the reaction mixture was incubated for 1 h at 37  $^{\circ}\text{C}$ , Amicon 10K centrifugal filter device (Millipore) was used to separate from excess **7** and to concentrate the sample solution to give HRP—SMCC **8** (3.60 mg/mL, 500  $\mu\text{L}$ , 90% yield).

To a solution of **8** (704  $\mu\text{g}$ , 17.6 nmol) in 100 mM phosphate buffer (pH 7.0, 294  $\mu\text{L}$ ) was added R<sub>6</sub>GC peptide **4** (98.3  $\mu\text{g}$ , 88.0 nmol) in 100 mM phosphate buffer (pH 7.0, 98.3  $\mu\text{L}$ ) at room temperature. After the reaction mixture was incubated for 14 h at 4  $^{\circ}\text{C}$ , Amicon 10K centrifugal filter device was used to separate from excess **4** and to concentrate the sample solution to give HRP—CPP hybrid **9** (3.29 mg/mL, 210  $\mu\text{L}$ , 98% yield).

To a solution of HRP—CPP hybrid **9** (182  $\mu\text{g}$ , 4.55 nmol) in 100 mM phosphate buffer (pH 7.0, 132  $\mu\text{L}$ ) was added AQ derivative **6**<sup>[2]</sup> (20.4  $\mu\text{g}$ , 45.5 nmol) in 100 mM phosphate buffer (pH 7.0, 20.4  $\mu\text{L}$ ) at room temperature. After the reaction mixture was incubated for 14 h at 4  $^{\circ}\text{C}$ , Amicon 10K centrifugal filter device was used to separate from excess **6** and to concentrate the sample solution to give AQ—HRP—CPP hybrid **1** (0.753 mg/mL, 191  $\mu\text{L}$ , 79% yield).

The chemical yields of **8**, **9** and **1** were calculated based on UV spectroscopy, MALDI TOF MS and Bradford method as shown below.

### MALDI TOF MS analysis

The sample (1.00  $\mu\text{L}$ ) was mixed with sinapinic acid (1.00  $\mu\text{L}$  in 0.1% TFA in water: acetonitrile = 50:50) matrix. Analyses by MALDI TOF MS were performed in the positive ion mode.

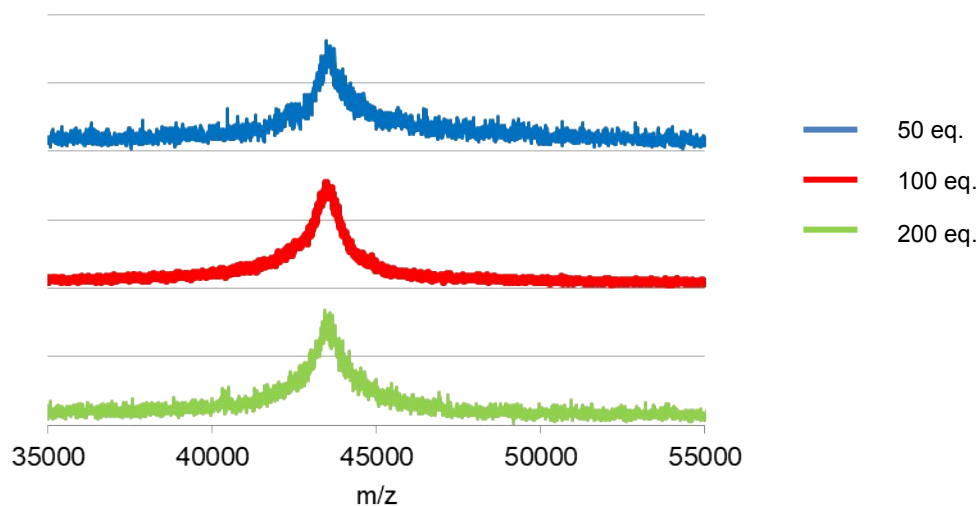

**Fig. S1** MALDI-TOF MS spectra of HRP—SMCC **8** synthesized with **7** (50 eq.) (blue,  $M_w$  43469), **7** (100 eq.) (red,  $M_w$  43476) and **7** (200 eq.) (green,  $M_w$  43418).

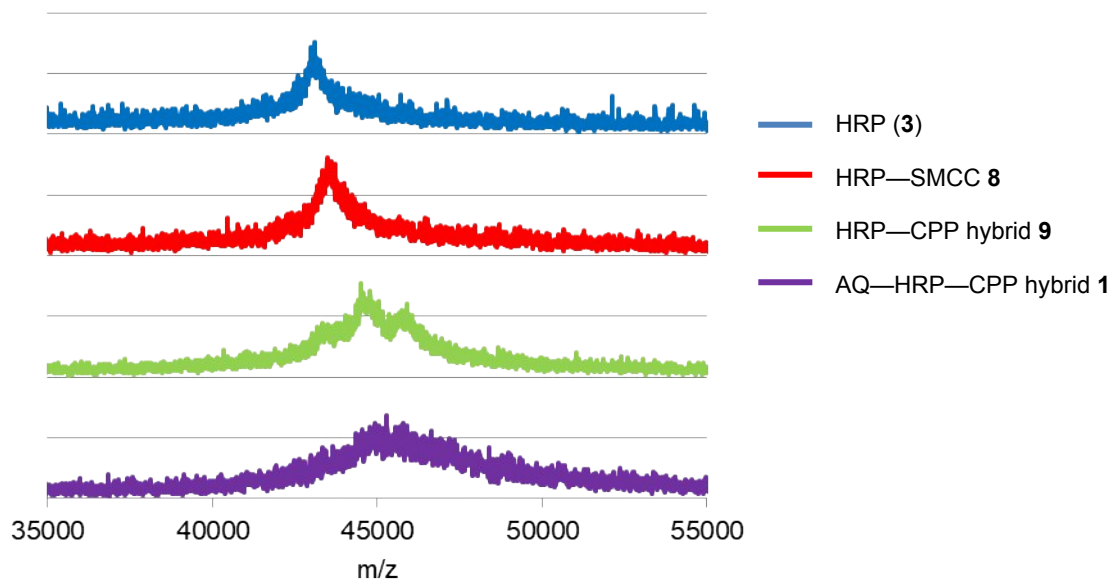

**Fig. S2** MALDI-TOF MS spectra of HRP (3) (blue,  $M_w$  42971), HRP-SMCC 8 (red,  $M_w$  43469), HRP-CPP hybrid 9 (green,  $M_w$  44486) and AQ-HRP-CPP hybrid 1 (purple,  $M_w$  44925).

### UV spectrum charts of hybrid 1 and HRP (3)

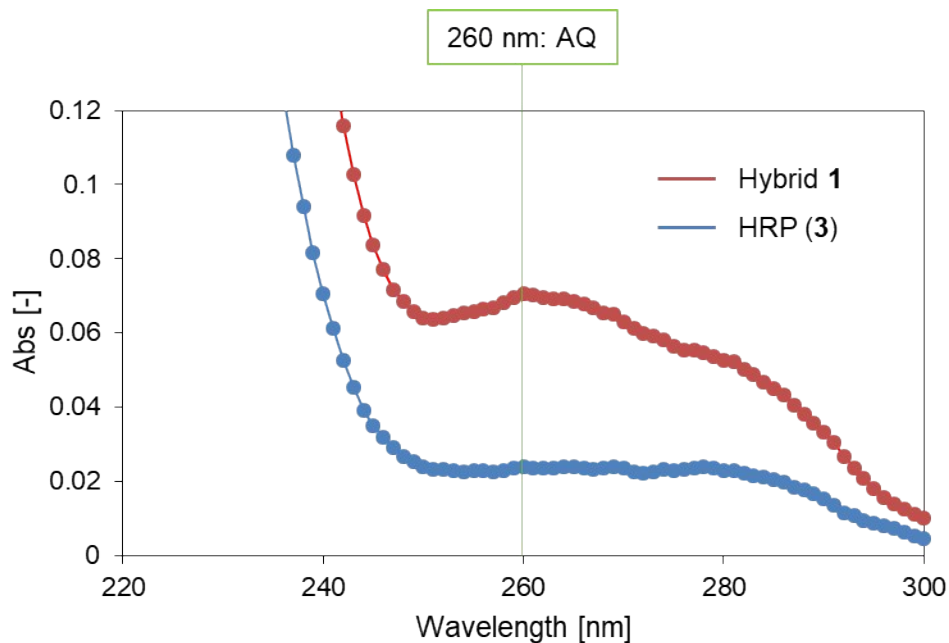

**Fig. S3** UV spectra of 1 and 3. These compounds (12  $\mu$ M) were dissolved in phosphate buffer (100 mM, pH 7.0).

### **Bradford assay<sup>[3]</sup>**

To a sample (10.0  $\mu\text{L}$ ) in test tube, a volume of 300  $\mu\text{L}$  Bradford assay reagent (Thermo Scientific) was added, and then the resulting mixture was blended by gentle vortex mixing. After 5 min, absorbance at 595 nm was measured in plastic 96-well microplate against a reagent blank using microplate reader, SpectraMax i3 (Molecular Devices). The calibration curve was built using BSA samples (0.100-0.500  $\mu\text{g}$ ).

### **Photo-self-degradation of hybrid 1**

A solution of HRP (**3**) or hybrid **1** (3  $\mu\text{M}/\text{lane}$ ) in 100 mM phosphate buffer (pH 7.0, 10.0  $\mu\text{L}$ ) was incubated at 25  $^{\circ}\text{C}$  for 0, 30, 60 and 120 min with or without photo-irradiation using a UV lamp (365 nm, 100 W) placed 10 cm from the sample. And then, 2.00  $\mu\text{L}$  of electrophoresis buffer (Tris (0.35 M), SDS (10%, wt/vol), glycerol (36%, wt/vol), 2-mercaptoethanol (5%, wt/vol) and bromophenol blue (0.012%, wt/vol)) was added to the photo-irradiated samples. The photo-degradation products were separated by SDS-PAGE in 12.5% polyacrylamide gels. The gels were run by applying 30 mA for 90 min, stained with SYPRO Ruby Protein Gel Stain (Bio-Rad Lab. Inc.) for 14 h, destained in acetic acid (7%, vol/vol) and methanol (10%, vol/vol) for 0.5 h, and washed with deionized water. The gels were scanned with a Molecular Image FX (Bio-Rad Lab. Inc.). Molecular weight markers were used in each gel for calibration purpose.

### **Enzyme activity assay<sup>[4]</sup>**

*o*-Phenylenediamine (OPD) stock solution (3.7 mM) was prepared by dissolving OPD in citrate buffer (25 mM citric acid, 58 mM sodium hydrogen phosphate, 2.65 mM  $\text{H}_2\text{O}_2$ ). A solution of HRP (**3**) or hybrid **1** (2.5 nM) in citrate buffer (25 mM citric acid, 58 mM sodium hydrogen phosphate) was incubated at 25  $^{\circ}\text{C}$  for 10 min with or without photo-irradiation using a UV lamp (365 nm, 100 W) placed 10 cm from the sample. And then, the stock solution was added to the photo-irradiated samples. After the mixture was incubated for 10 min at 25  $^{\circ}\text{C}$ , 50.0  $\mu\text{L}$  of 4 N  $\text{H}_2\text{SO}_4$  solution was added to the samples to stop the enzymatic reaction. The absorbance at 490 nm was measured in plastic 96-well microplate using microplate reader.

### **Cell culture**

#### **< A431 cell >**

The A431 cell line was routinely grown in Dulbecco's modified Eagle's medium (DMEM) supplemented with 10% (v/v) Fetal bovine serum, 0.5% (v/v) penicillin and kanamycine. The cells were maintained at 37  $^{\circ}\text{C}$  in a humidified atmosphere containing 5%  $\text{CO}_2$  plus air.

#### **<WI-38 cell >**

The WI-38 cell line was routinely grown in Eagle's minimum essential medium (MEM) supplemented with 10% (v/v) Fetal bovine serum, 0.5% (v/v) penicillin and kanamycine. The cells were maintained at 37 °C in a humidified atmosphere containing 5% CO<sub>2</sub> plus air.

### **Histological staining<sup>[5]</sup>**

WI-38 or A431 cells ( $1 \times 10^4$  cells) in 100  $\mu$ L of medium were cultured in 96-well microplates, and then incubated for 24 h at 37 °C under 5% CO<sub>2</sub> plus air. The cells were treated with a solution of HRP (**3**) or hybrid **1** (final concentration, 300 nM) in PBS (pH 7.4, 2  $\mu$ L) for 24 h at 37 °C under 5% CO<sub>2</sub> plus air. The cells were washed with medium ( $3 \times 100$   $\mu$ L), and then preincubated with or without photo-irradiation using a UV lamp (368 nm, 30 W) placed at 10 cm from the vessel at 25 °C for 3 h. After washing with PBS ( $3 \times 100$   $\mu$ L), cells were fixed with 4% paraformaldehyde phosphate buffer solution (100  $\mu$ L) for 15 min, washed again with PBS (1  $\times 100$   $\mu$ L). Cells were incubated with a staining solution of 3,3'-diaminobenzidine (DAB) (460  $\mu$ M) and H<sub>2</sub>O<sub>2</sub> (580  $\mu$ M) in 10 mM PBS (pH 7.2, 100  $\mu$ L) for 10 min. When the desired degree of staining intensity was reached, the reaction was terminated by washing in distilled water ( $2 \times 100$   $\mu$ L). Images were collected on EVOS AMF-4302 microscope (Advanced Microscopy Group) using a 40x (transmitted light) objective.

### **Western blotting**

WI-38 and A431 cells ( $5.0 \times 10^5$  cells) were plated on 60 mm dishes. After reaching confluence, cells were treated with a solution of HRP (**3**) or hybrid **1** (final concentration, 300 nM) for 24 h at 37 °C under 5% CO<sub>2</sub> plus air. The cells were washed three times with medium, and then preincubated with or without photo-irradiation using a UV lamp (368 nm, 30 W) placed at 10 cm from the dishes at room temperature for 3 h. After washing with cold PBS, adherent cells were scraped with rubber policeman and centrifuged for 5 min at 3500 rpm at 4 °C. The pellet was then resuspended in 50  $\mu$ L lysis buffer (50 mM HEPES (pH 8.0), 150 mM NaCl, 1.5 mM MgCl<sub>2</sub>, 1 mM PMSF, 1% triton X-100, 10% glycerol) containing protease inhibitor cocktail (NAKARAI TESQUE Inc.) and homogenized with ULTRA SONIC HOMOGENIZER UH-50 (SMT Co., Ltd). The lysate was centrifuged for 30 min at 13500 rpm at 4 °C. Equal amounts of protein were separated by SDS-PAGE in 10% polyacrylamide gels. Proteins were transferred onto nitrocellulose membranes Hybond<sup>TM</sup>-ECL (GE Healthcare). Membranes were blocked with Tris-buffered saline-0.1% Tween 20 (TBST) containing 5% or 10% nonfat dry milk for 1 h at room temperature and membranes were incubated with appropriately diluted primary antibodies at 4 °C overnight. After washing five times with TBST, the blots were incubated with the horseradish peroxidase-conjugated specific secondary antibody for 2 h at 4 °C and then washed five times again. Then the complexes were visualized in Medical Film Processer FPM100 (Fujifilm Co.)

using the enhanced chemiluminescence reagents, Immobilon™ Western (Millipore Co.). The following primary antibodies were used for detection of specific bands: horseradish peroxidase and  $\alpha$ -tubulin. The following secondary antibodies were used for detection of specific bands: HRP-conjugated anti-mouse IgG.

### MTT assay

WI-38 or A431 cells ( $1 \times 10^4$  cells) in 100  $\mu$ L of medium were cultured in 96-well microplates, and then incubated for 24 h at 37 °C under 5% CO<sub>2</sub> plus air. The cells were treated with hybrid **1** (final concentration, 300 nM) in PBS (pH 7.4, 2  $\mu$ L) for 24 h at 37 °C under 5% CO<sub>2</sub> plus air. The cells were washed with medium ( $3 \times 100$   $\mu$ L), and then preincubated at 25 °C for 1, 2 and 3 h with or without photo-irradiation using a UV lamp (368 nm, 30 W) placed at 10 cm from the vessel. 10  $\mu$ L of 5 mg/mL MTT dissolved in PBS was added to each well. After incubation for 3 h at 37 °C under 5% CO<sub>2</sub> plus air, 100  $\mu$ L of DMSO was added to each well. The absorbance of the mixture was measured at 540 nm using microplate reader.

### References

- [1] S. Futaki, T. Suzuki, W. Ohashi, T. Yagami, S. Tanaka, K. Ueda and Y. Sugiura, *J. Biol. Chem.*, 2001, **276**, 5836.
- [2] Y. Imai, S. Hirono, H. Matsuba, T. Suzuki, Y. Kobayashi, H. Kawagishi, D. Takahashi and K. Toshima, *Chem. Asian J.*, 2012, **7**, 97.
- [3] (a) T. Spector, *Anal. Biochem.*, 1978, **86**, 142; (b) J. E. Noble and M. J. A. Bailey, *Methods Enzymol*, 2009, **463**, 73.
- [4] J. H. Bovaird, T. T. Ngo and H. M. Lenhoff, *Clin. Chem.*, 1982, **28**, 2423.
- [5] S. Fawell, J. Seery, Y. Daikh, C. Moore, L. L. Chen, B. Pepinsky and J. Barsoum, *Proc. Natl. Acad. Sci. USA*, 1994, **91**, 664.
